# Supplementary material
Source: Royal Society of Chemistry journal article supplement (doi:10.1039/d6cy00367b)
Supplement: d6cy00367b1.pdf [file d6cy00367b1.pdf]

# **Microwave-assisted aqueous MMA polymerization over TiO<sub>2</sub> nanotubes decorated with vanadium complexes**

Joanna Drzeżdżon<sup>\*a,b</sup>, Paulina Parcheta-Szwindowska<sup>c</sup>, Mateusz A. Baluk<sup>a</sup>, Olga Chernyayeva<sup>d</sup>, Yanchen Liu<sup>b</sup>, Nicola Pinna<sup>b</sup>

<sup>a</sup>Department of Environmental Technology, Faculty of Chemistry, University of Gdansk, Wita Stwosza 63, 80-308 Gdansk, Poland

<sup>b</sup>Department of Chemistry and The Center for the Science of Materials Berlin, Humboldt-Universität zu Berlin, Berlin, Germany

<sup>c</sup>Department of Polymer Technology, Faculty of Chemistry, Gdańsk University of Technology, G. Narutowicza St. 11/12, 80-233 Gdańsk, Poland

<sup>d</sup>Institute of Physical Chemistry, Polish Academy of Science, Kasprzaka 44/52, 01-224 Warsaw, Poland

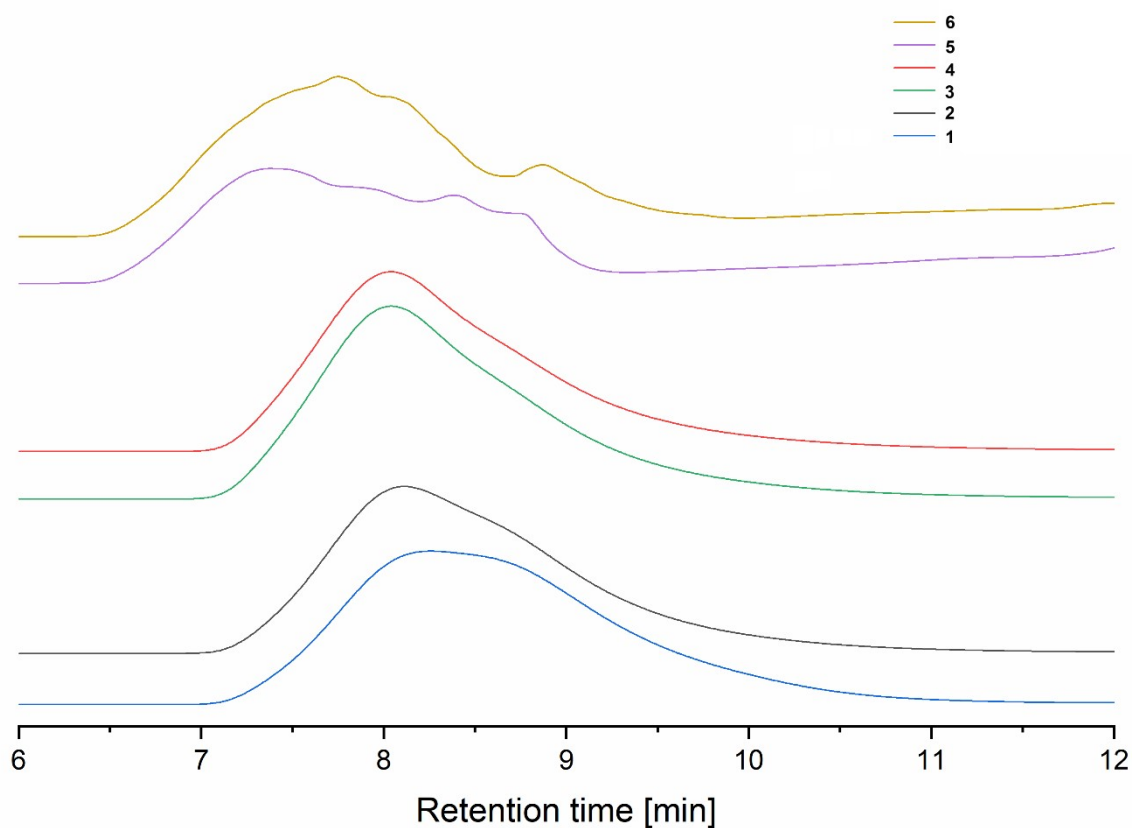

**Figure S1.** GPC chromatogram for PMMA samples obtained using different conditions and catalysts: 1 - VO(dipic)(bipy)<sup>a</sup>, 2 - VO(dipic)(phen)<sup>a</sup>, 3 - VO(dipic)(bipy)/TiO<sub>2</sub><sup>a</sup>, 4 - VO(dipic)(phen)/TiO<sub>2</sub><sup>a</sup>, 5 - VO(dipic)(bipy)/TiO<sub>2</sub><sup>MW</sup>, 6 - VO(dipic)(phen)/TiO<sub>2</sub><sup>MW</sup>.  
<sup>a</sup>Conditions: precatalyst (3 μmol), 1500eq. Et<sub>2</sub>AlCl (activator), 1 mL DMSO, 1 mL toluene, 1 atm; <sup>MW</sup>Conditions: microwave, aqua, 80 °C, 150 W, 2 bar, 15 minutes, 1.5mL MMA.

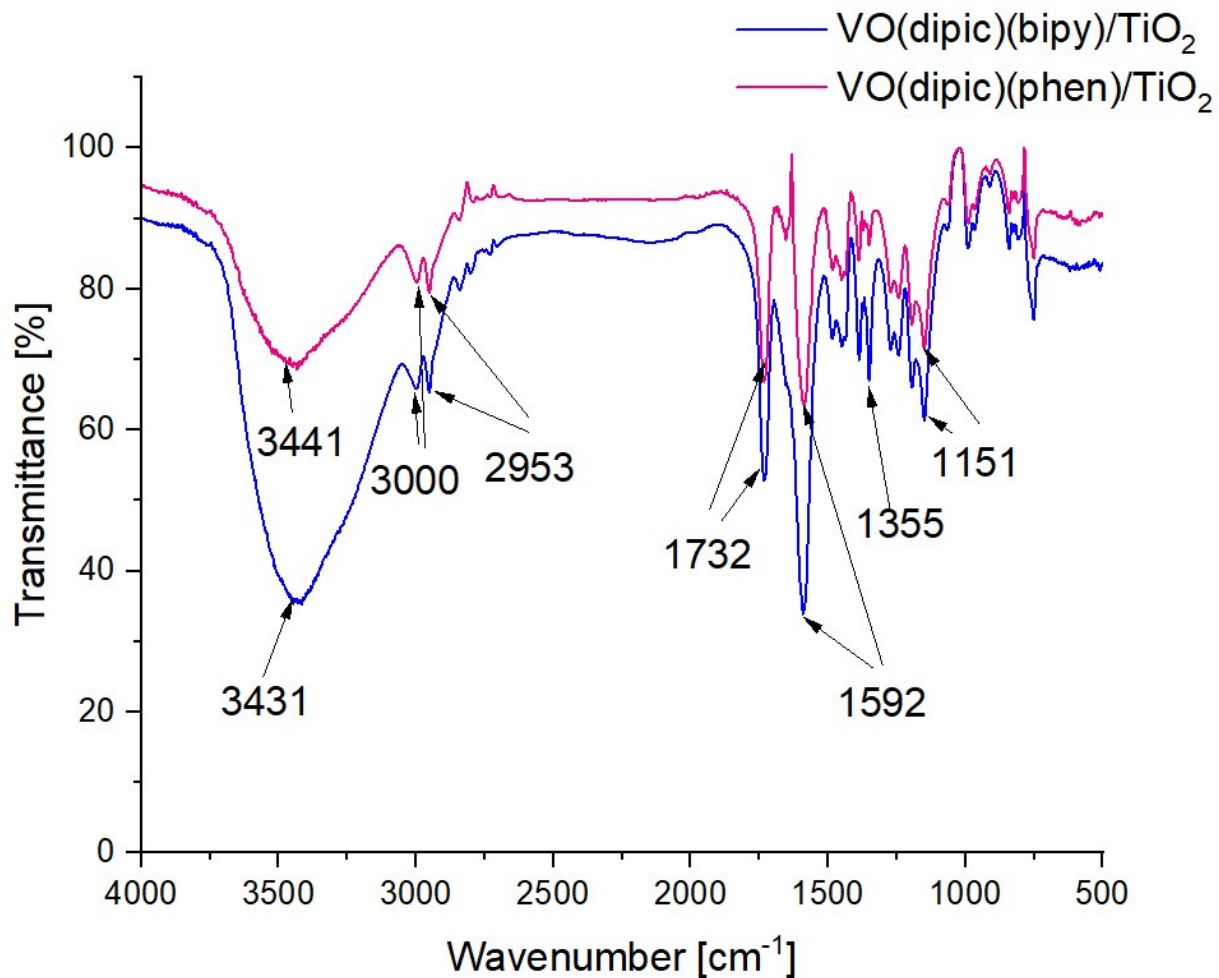

**Figure S2.** FT-IR spectra for PMMA obtained using  $\text{VO(dipic)(phen)/TiO}_2$  and  $\text{VO(dipic)(bipy)/TiO}_2$  in aqueous solution (microwave; 80 °C)

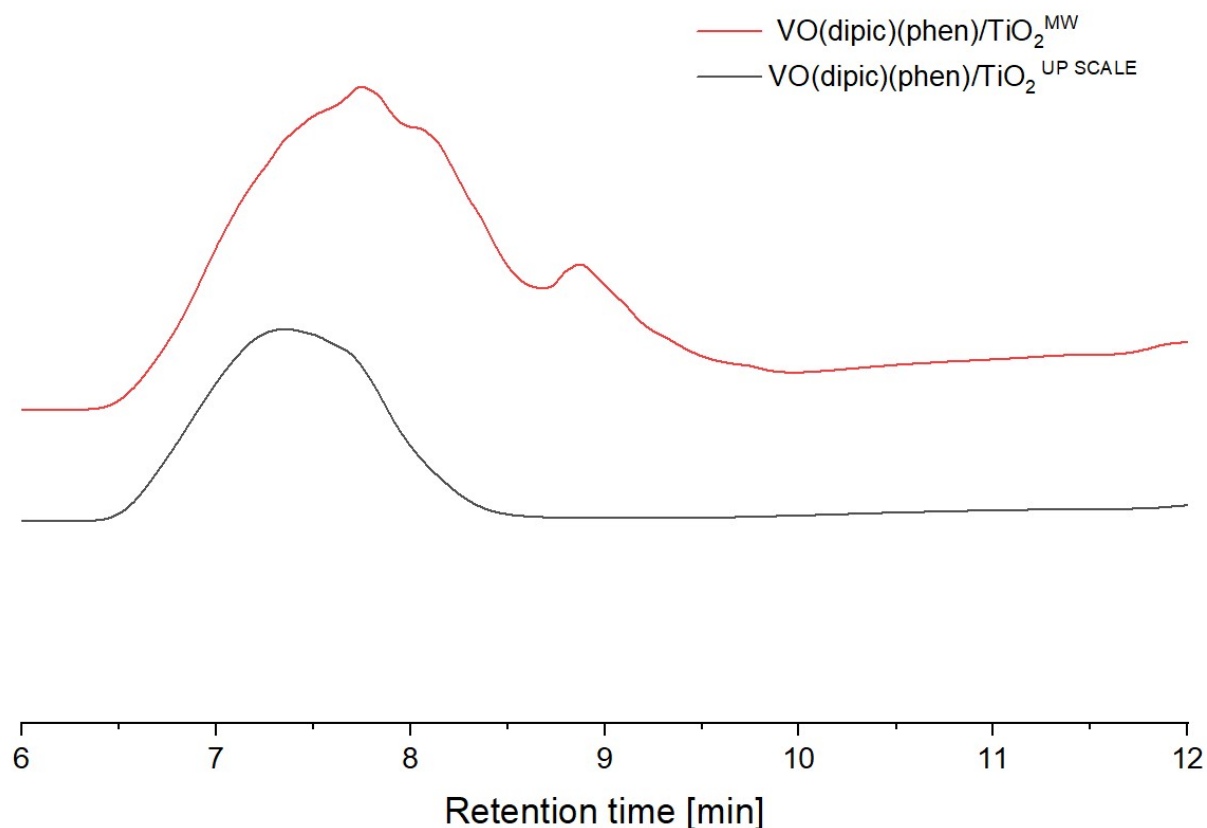

**Figure S3.** GPC chromatograms for PMMA samples obtained using VO(dipic)(phen)\TiO<sub>2</sub> and in aqueous solution (microwave; up-scale).

**Table S1.** The summary of the number (Mn) and weight (Mw) average molecular weights and polydispersity (PDI) of PMMA samples.

| Catalyst                                             | Mn (Da) | Mw (Da)   | PDI (-) |
|------------------------------------------------------|---------|-----------|---------|
| VO(dipic)(phen)/TiO <sub>2</sub> <sup>MW</sup>       | 536 916 | 903 506   | 1.68    |
|                                                      | 125 645 | 127 987   | 1.02    |
|                                                      | 39 389  | 40 198    | 1.02    |
| VO(dipic)(phen)/TiO <sub>2</sub> <sup>UP SCALE</sup> | 429 289 | 1 239 241 | 2.88    |

**Table S2.** XPS study results of samples before being used as catalysts.

| Catalyst                               | Region             | Assignment                | Binding Energy [eV] | FWHM [eV] | Atomic Conc. [%] |
|----------------------------------------|--------------------|---------------------------|---------------------|-----------|------------------|
| <b>VO(dipic)(bipy)/TiO<sub>2</sub></b> | V 2p <sub>3</sub>  | V(IV)                     | 516.06              | 1.49      | 0.49             |
|                                        |                    | V(V)                      | 517.08              | 1.49      | 0.87             |
|                                        | Ti 2p <sub>3</sub> | Ti(IV) - TiO <sub>2</sub> | 458.8               | 1.15      | 15.93            |
|                                        | O 1s               | Oxide (TiO <sub>2</sub> ) | 529.93              | 1.19      | 27.96            |
|                                        |                    | Oxide V-O                 | 530.84              | 1.7       | 9.74             |
|                                        |                    | C=O                       | 532.09              | 1.7       | 7.69             |
|                                        | N 1s               | Pyridinic N               | 399.94              | 1.6       | 3.15             |
|                                        |                    | Pyridine                  | 401.84              | 1.6       | 0.4              |
|                                        |                    | N-oxide                   |                     |           |                  |
|                                        | C 1s               | Csp <sup>2</sup>          | 284.3               | 1.14      | 4.72             |
|                                        |                    | Csp <sup>3</sup>          | 285                 | 1.14      | 13.55            |
|                                        |                    | C-N / C-O                 | 286.1               | 1.63      | 9.29             |
|                                        |                    | O=C-O                     | 288.4               | 1.51      | 5.72             |
|                                        | K 2p <sub>3</sub>  | K <sup>+</sup>            | 292.8               | 1.15      | 0.49             |
| <b>VO(dipic)(phen)/TiO<sub>2</sub></b> | V 2p <sub>3</sub>  | V(IV)                     | 515.94              | 1.4       | 0.95             |
|                                        |                    | V(V)                      | 517.24              | 1.49      | 1.36             |
|                                        | Ti 2p <sub>3</sub> | Ti(IV) - TiO <sub>2</sub> | 458.76              | 1.09      | 11.04            |
|                                        | O 1s               | Oxide (TiO <sub>2</sub> ) | 529.96              | 1.18      | 22.4             |
|                                        |                    | Oxide V-O                 | 530.88              | 1.22      | 7.67             |
|                                        |                    | C=O                       | 531.79              | 1.4       | 8.11             |
|                                        | N 1s               | Pyridinic N               | 399.5               | 1.48      | 4.4              |
|                                        |                    | Pyridine                  | 401.23              | 1.76      | 0.56             |
|                                        |                    | N-oxide                   |                     |           |                  |
|                                        | C 1s               | Csp <sup>2</sup>          | 284.3               | 1.3       | 8.28             |
|                                        |                    | Csp <sup>3</sup>          | 285.05              | 1.6       | 23.62            |
|                                        |                    | C-N / C-O                 | 286.04              | 1.4       | 4.55             |
|                                        |                    | O=C-O                     | 288.42              | 1.4       | 6.26             |
|                                        |                    | π-π shake-up              | 291.69              | 1.38      | 0.8              |

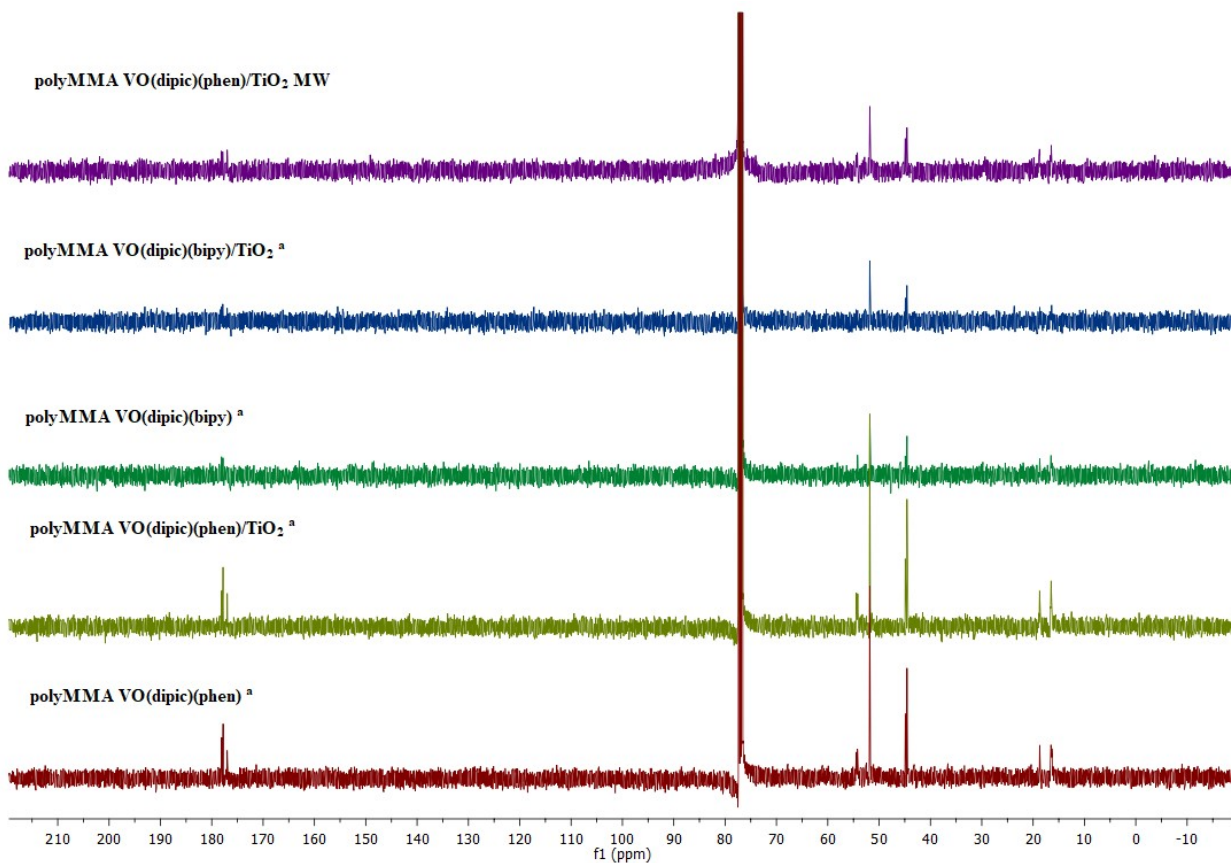

**Figure S4.**  $^{13}\text{C}$  NMR spectra of PMMA. <sup>a</sup>Conditions: precatalyst (3  $\mu\text{mol}$ ), 1500eq.  $\text{Et}_2\text{AlCl}$  (activator), 1 mL DMSO, 1 mL toluene, 1 atm; <sup>MW</sup>Conditions: microwave, aqueous solution, 80  $^\circ\text{C}$ , 150 W, 2 bar, 15 minutes, 1.5mL MMA.

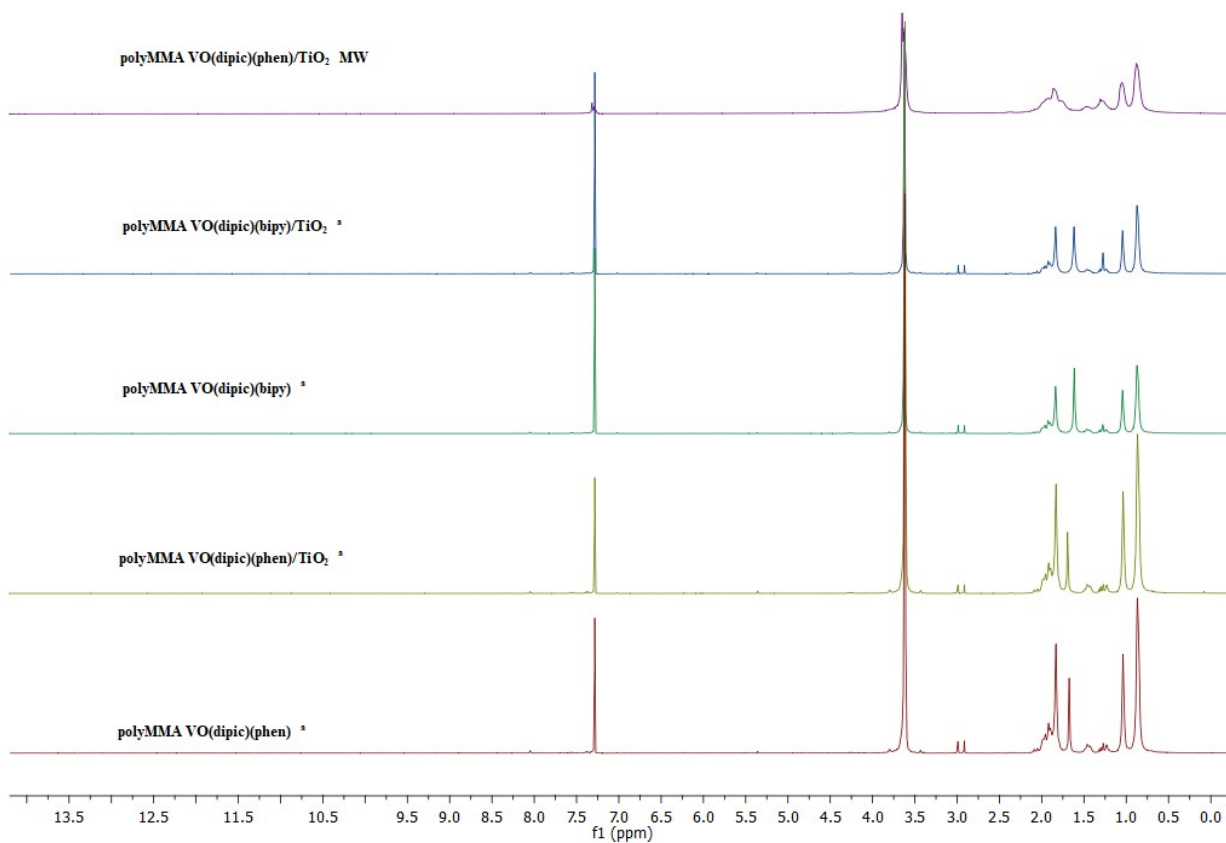

**Figure S5.** <sup>1</sup>H NMR spectra of PMMA. <sup>a</sup>Conditions: precatalyst (3 μmol), 1500eq. Et<sub>2</sub>AlCl (activator), 1 mL DMSO, 1 mL toluene, 1 atm; <sup>MW</sup>Conditions: microwave, aqueous solution, 80 °C, 150 W, 2 bar, 15 minutes, 1.5mL MMA.

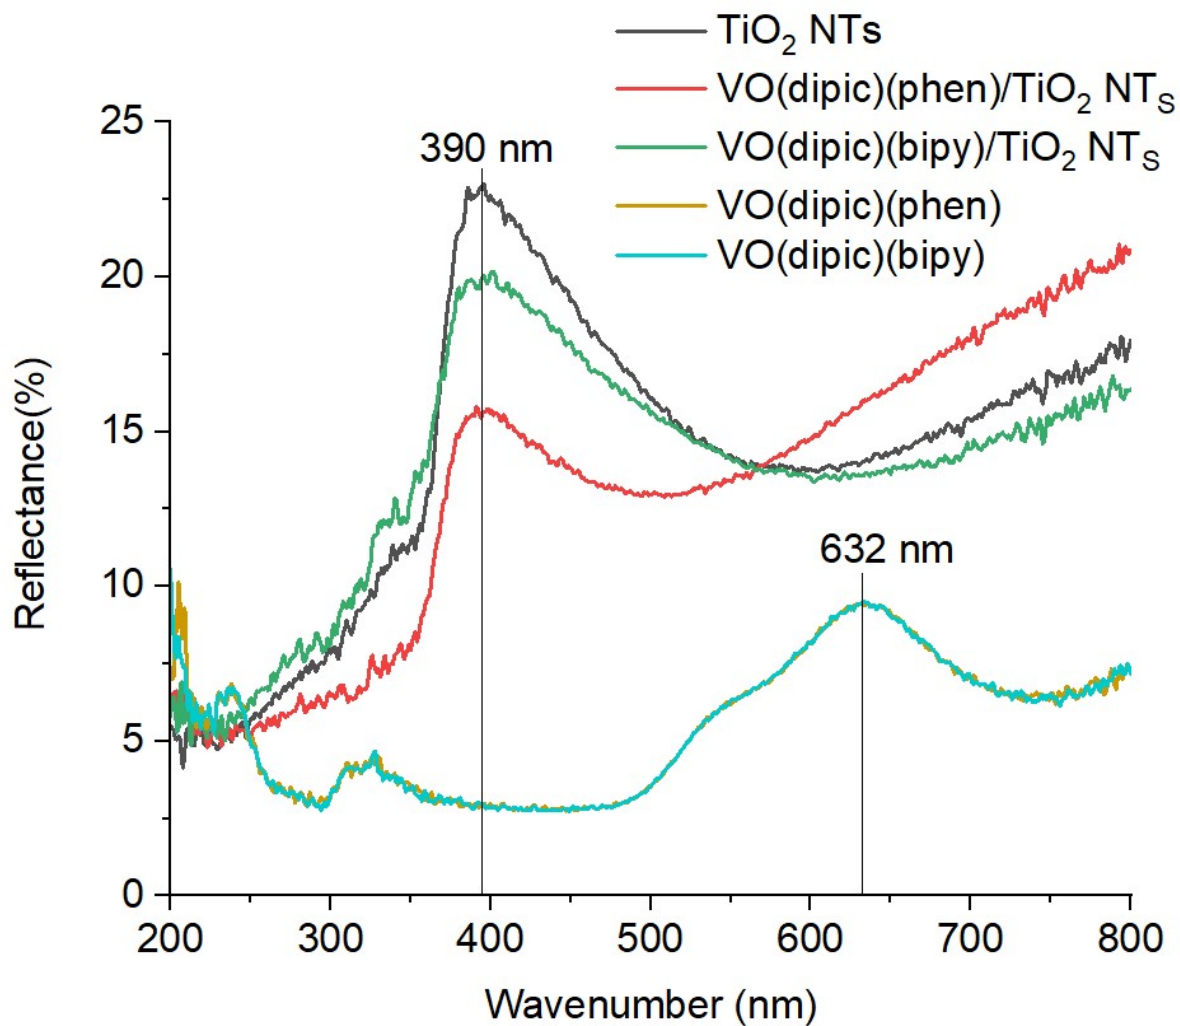

**Figure S6.** UV-Vis diffuse reflectance (DRS) spectra of the pristine TiO<sub>2</sub> NTs, pure vanadium(IV) coordination complexes, and the corresponding immobilized nanocomposites.

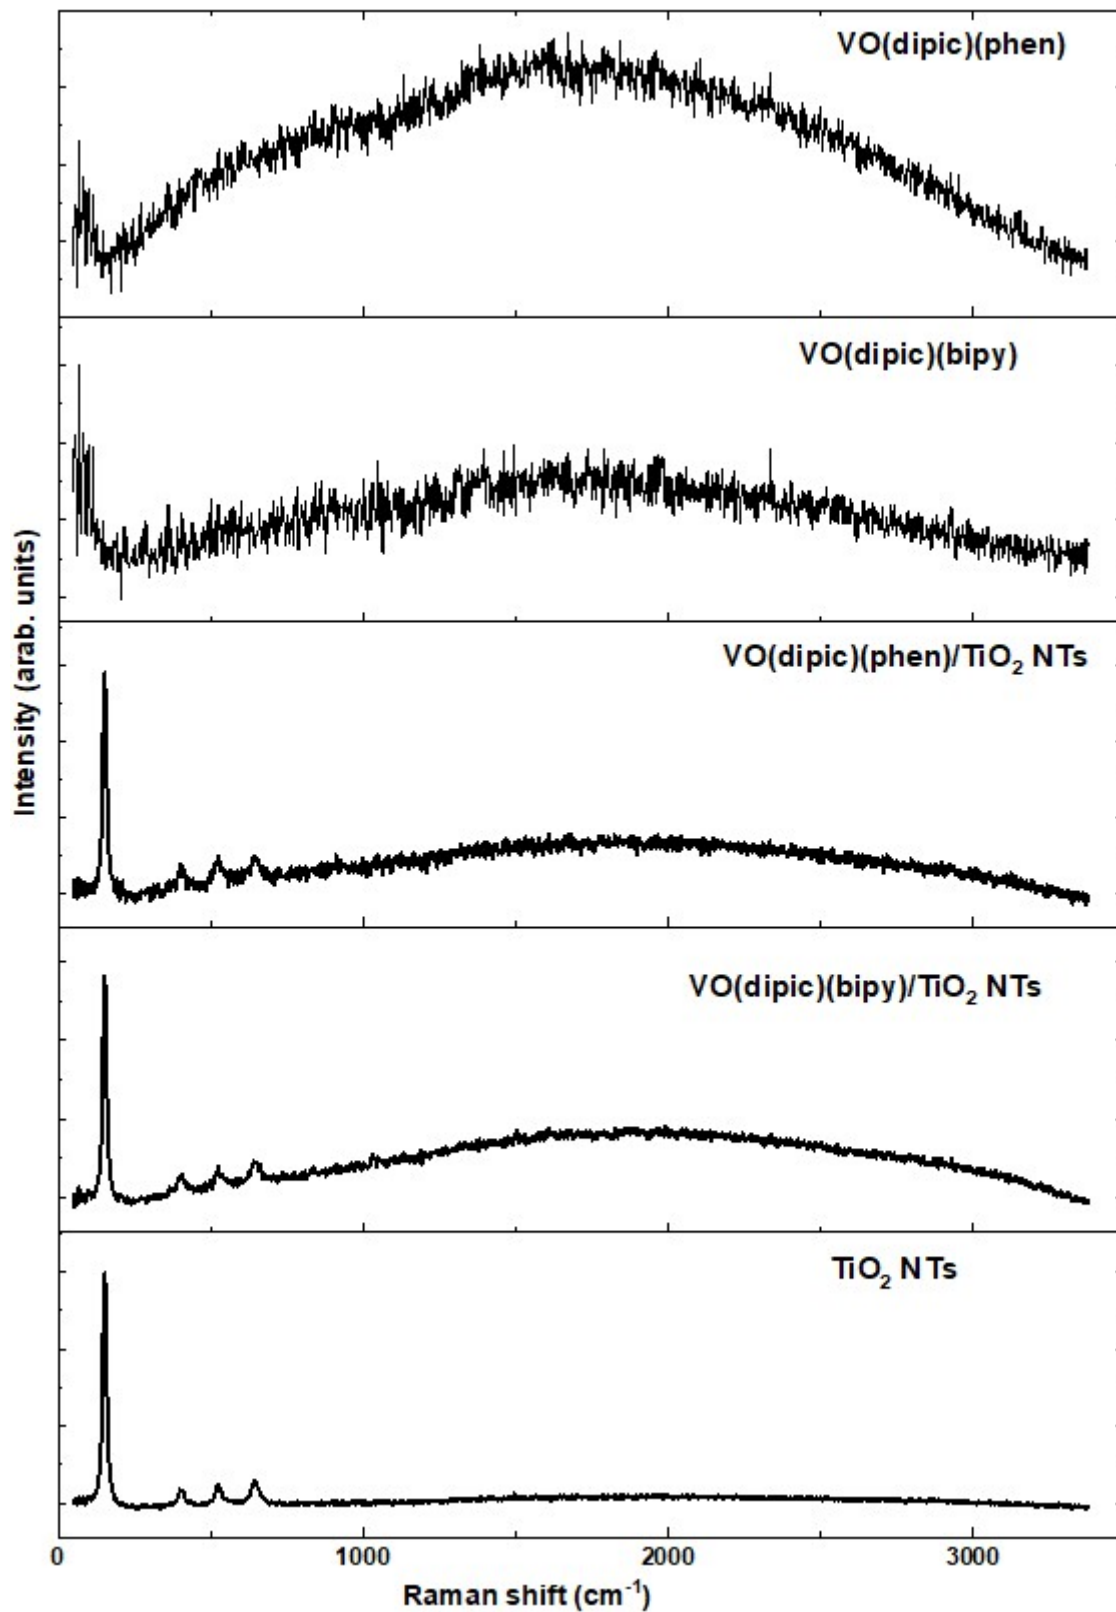

**Figure S7.** Raman spectra of the pristine TiO<sub>2</sub> NTs, pure vanadium(IV) coordination complexes, and the functionalized nanocomposites.

**Table S3.** Experimental sampling matrix for the optimization of microwave-assisted aqueous MMA polymerization.

| Catalyst System                  | Method / Medium              | Temp. [°C] | Time [min] | Pressure [bar] | SDS [mg] | Yield [mg] |
|----------------------------------|------------------------------|------------|------------|----------------|----------|------------|
| VO(dipic)(bipy)                  | Conventional (Toluene/DMSO)  | 65         | 60         | 1              | 0        | 112        |
| VO(dipic)(bipy)/TiO <sub>2</sub> | Conventional (Toluene/DMSO)  | 65         | 60         | 1              | 0        | 151        |
| VO(dipic)(phen)                  | Conventional (Toluene/DMSO)  | 65         | 60         | 1              | 0        | 150        |
| VO(dipic)(phen)/TiO <sub>2</sub> | Conventional (Toluene/DMSO)  | 65         | 60         | 1              | 0        | 198        |
| VO(dipic)(bipy)/TiO <sub>2</sub> | Microwave (Aqueous Emulsion) | 80         | 15         | 2              | 100      | 619        |
| VO(dipic)(phen)/TiO <sub>2</sub> | Microwave (Aqueous Emulsion) | 80         | 15         | 2              | 100      | 854        |
| VO(dipic)(phen)/TiO <sub>2</sub> | Microwave (Aqueous Emulsion) | 80         | 5          | 2              | 100      | 120        |
| VO(dipic)(phen)/TiO <sub>2</sub> | Microwave (Aqueous Emulsion) | 80         | 10         | 2              | 100      | 500        |
| VO(dipic)(phen)/TiO <sub>2</sub> | Microwave (Aqueous Emulsion) | 80         | 20         | 2              | 100      | 880        |
| VO(dipic)(phen)/TiO <sub>2</sub> | Microwave (Aqueous Emulsion) | 80         | 30         | 2              | 100      | 895        |
| VO(dipic)(phen)/TiO <sub>2</sub> | Microwave (Aqueous Emulsion) | 20         | 15         | 2              | 100      | 110        |
| VO(dipic)(phen)/TiO <sub>2</sub> | Microwave (Aqueous Emulsion) | 40         | 15         | 2              | 100      | 420        |
| VO(dipic)(phen)/TiO <sub>2</sub> | Microwave (Aqueous Emulsion) | 60         | 15         | 2              | 100      | 710        |
| VO(dipic)(phen)/TiO <sub>2</sub> | Microwave (Aqueous Emulsion) | 90         | 15         | 2              | 100      | 860        |
| VO(dipic)(phen)/TiO <sub>2</sub> | Microwave (Aqueous Emulsion) | 80         | 15         | 2              | 25       | 250        |
| VO(dipic)(phen)/TiO <sub>2</sub> | Microwave (Aqueous Emulsion) | 80         | 15         | 2              | 50       | 400        |

|                                  |                                 |    |    |   |     |     |
|----------------------------------|---------------------------------|----|----|---|-----|-----|
| VO(dipic)(phen)/TiO <sub>2</sub> | Microwave<br>(Aqueous Emulsion) | 80 | 15 | 2 | 200 | 830 |
| VO(dipic)(phen)/TiO <sub>2</sub> | Microwave<br>(Aqueous Emulsion) | 80 | 15 | 1 | 100 | 690 |

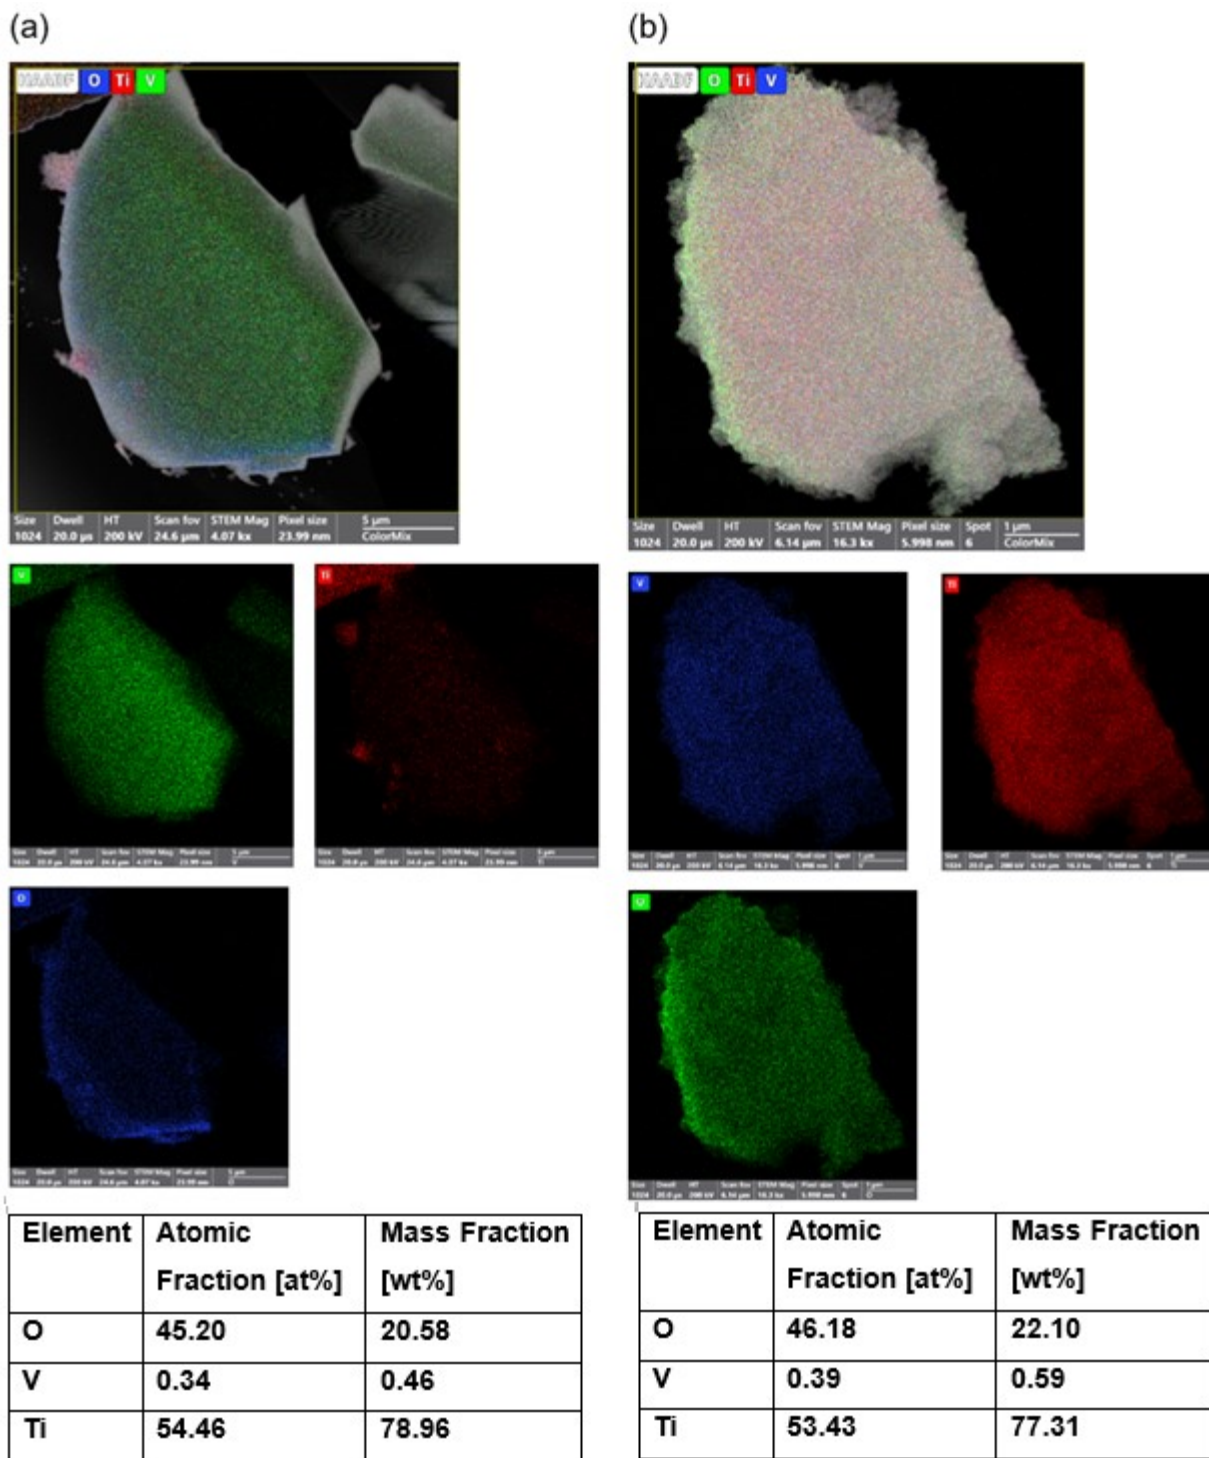

**Figure S8.** EDS mapping for bipy (a) and phen (b) catalytic systems.
